# Supplementary material for: A grape seed extract maternal dietary supplementation improves egg quality and reduces ovarian steroidogenesis without affecting fertility parameters in reproductive hens
Source: PubMed Central journal article supplement (PMC7224513; doi:10.1371/journal.pone.0233169), 2020-05-14
Supplement: pone.0233169.s001.pdf [file pone.0233169.s001.pdf]

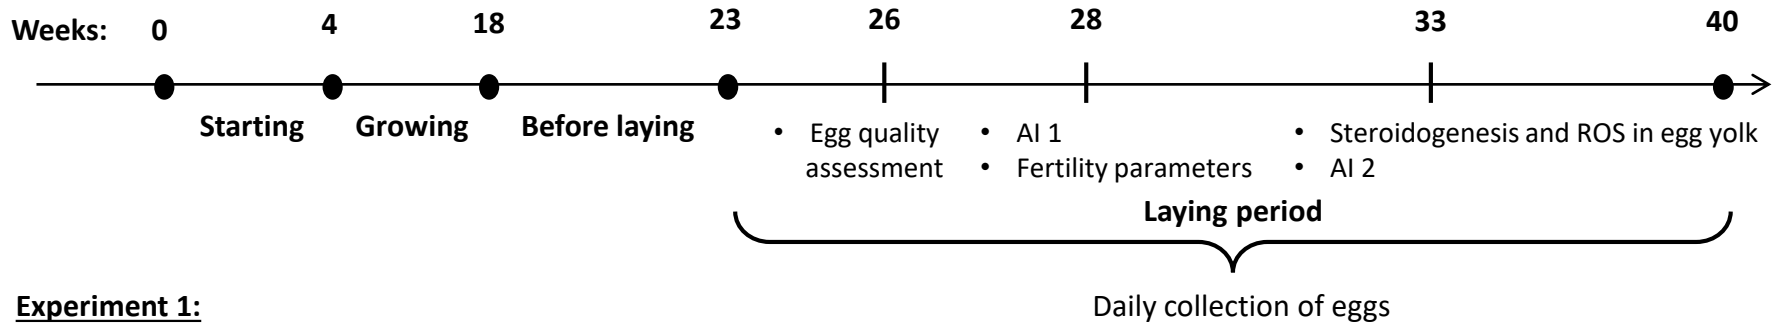

**Experiment 1:**

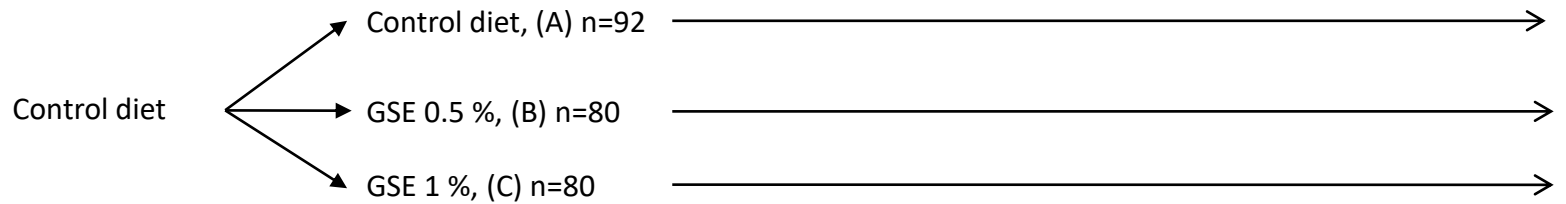

**Experiment 2:**

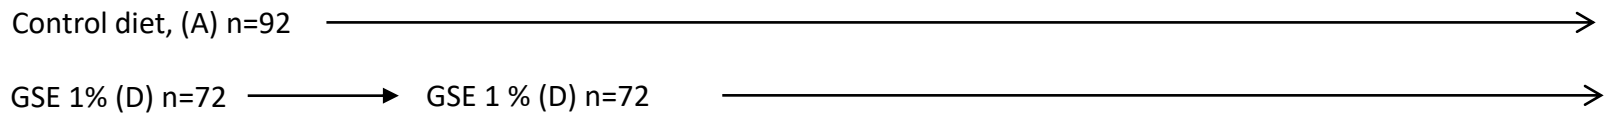

**S1 Fig**
