# Supplementary material for: A grape seed extract maternal dietary supplementation improves egg quality and reduces ovarian steroidogenesis without affecting fertility parameters in reproductive hens
Source: PubMed Central journal article supplement (PMC7224513; doi:10.1371/journal.pone.0233169), 2020-05-14
Supplement: pone.0233169.s002.pdf [file pone.0233169.s002.pdf]

|                           | Starting |       | Growing |       |       |       | Before laying |       |       |       | Laying   |       |       |       |
|---------------------------|----------|-------|---------|-------|-------|-------|---------------|-------|-------|-------|----------|-------|-------|-------|
| Weeks                     | 0 to 4   |       | 5 to 17 |       |       |       | 18 to 21      |       |       |       | 22 to 40 |       |       |       |
| Diet                      | A        | D     | A       | B     | C     | D     | A             | B     | C     | D     | A        | B     | C     | D     |
| Corn                      | 39.64    | 39.64 | 36.58   | 36.58 | 36.58 | 36.58 | 49.33         | 49.33 | 49.33 | 49.33 | 54.19    | 54.19 | 54.19 | 54.19 |
| Wheat                     | 23.86    | 23.86 | 30      | 30    | 30    | 30    | 22.22         | 22.22 | 22.22 | 22.22 | 8        | 8     | 8     | 8     |
| Soybean meal              | 29.3     | 29.3  | 3.32    | 3.32  | 3.32  | 3.32  | 14.37         | 14.37 | 14.37 | 14.37 | 13.95    | 13.95 | 13.95 | 13.95 |
| Wheat bran                | 0        | 0     | 11.29   | 11.29 | 11.29 | 11.29 | 0             | 0     | 0     | 0     | 0        | 0     | 0     | 0     |
| Soy oil                   | 2.2      | 2.2   | 1       | 1     | 1     | 1     | 1.02          | 1.02  | 1.02  | 1.02  | 2        | 2     | 2     | 2     |
| Sunflower oil             | 1        | 1     | 14      | 14    | 14    | 14    | 8             | 8     | 8     | 8     | 5.8      | 5.8   | 5.8   | 5.8   |
| Sodium Bicarbonate        | 0.18     | 0.18  | 0.1     | 0.1   | 0.1   | 0.1   | 0.1           | 0.1   | 0.1   | 0.1   | 0.1      | 0.1   | 0.1   | 0.1   |
| Calcium carbonate         | 0.86     | 0.86  | 1.08    | 1.08  | 1.08  | 1.08  | 2.1           | 2.1   | 2.1   | 2.1   | 6.6      | 6.6   | 6.6   | 6.6   |
| Phosphate                 | 2.06     | 2.06  | 1.77    | 1.77  | 1.77  | 1.77  | 2.06          | 2.06  | 2.06  | 2.06  | 2.2      | 2.2   | 2.2   | 2.2   |
| Salt                      | 0.3      | 0.3   | 0.29    | 0.29  | 0.29  | 0.29  | 0.29          | 0.29  | 0.29  | 0.29  | 0.28     | 0.28  | 0.28  | 0.28  |
| Methionine DL             | 0.1      | 0.1   | 0       | 0     | 0     | 0     | 0.01          | 0.01  | 0.01  | 0.01  | 0.05     | 0.05  | 0.05  | 0.05  |
| Lysine                    | 0        | 0     | 0.07    | 0.07  | 0.07  | 0.07  | 0             | 0     | 0     | 0     | 0        | 0     | 0     | 0     |
| Mineral premix            | 0.5      | 0.5   | 0.5     | 0.5   | 0.5   | 0.5   | 0.5           | 0.5   | 0.5   | 0.5   | 0.5      | 0.5   | 0.5   | 0.5   |
| Soybean                   | 0        | 0     | 0       | 0     | 0     | 0     | 0             | 0     | 0     | 0     | 6.33     | 6.33  | 6.33  | 6.33  |
| <b>Grape Seed Extract</b> | 0        | 1     | 0       | 0.5   | 1     | 1     | 0             | 0.5   | 1     | 1     | 0        | 0.5   | 1     | 1     |

**Table S1: Composition of the diet for the different groups of animals**

A: control without supplementation, B and C: supplementation at 0.5% and 1% of the total diet composition, respectively, starting at 4 week-old until 40 week-old, and D: supplementation at 1% of the total diet composition, starting at hatch until 40 week-old.
