# Supplementary material for: A grape seed extract maternal dietary supplementation improves egg quality and reduces ovarian steroidogenesis without affecting fertility parameters in reproductive hens
Source: PubMed Central journal article supplement (PMC7224513; doi:10.1371/journal.pone.0233169), 2020-05-14
Supplement: pone.0233169.s003.pdf [file pone.0233169.s003.pdf]

**Table S2:** Oligonucleotide primer sequences

| <b>Gene</b>               | <b>Product size (bp)</b> | <b>Sequence Forward</b>       | <b>Sequence Reverse</b>         |
|---------------------------|--------------------------|-------------------------------|---------------------------------|
| <i>Actin</i>              | 188                      | 5'-ACGGAACCACAGTTTATCATC-3'   | 5'-GTCCCAGTCTTCAACTATACC-3'     |
| <i>GAPDH</i>              | 198                      | 5'-TGCTGCCCAGAACATCATCC-3'    | 5'-ATCAGCAGCAGCCTTCACTACC-3'    |
| <i>EIF3F</i>              | 167                      | 5'-GCACAACGAGTCCGAGGAT-3'     | 5'-CTTCCCGGCTGTAGTACTCG-3'      |
| <i>RARRES2</i>            | 314                      | 5'-CGCGTGGTGAAGGATGTG-3'      | 5'-CGACTGCTCCCTAAAGAGGAACT-3'   |
| <i>CMKLR1</i>             | 403                      | 5'-CGGTCAACGCCATTTGGT-3'      | 5'-GGGTAGGAAGATGTTGAAGGAA-3'    |
| <i>CCRL2</i>              | 391                      | 5'-CACGCAGTGTTTGCTTTAAAAGC-3' | 5'-CAACAGCCCACGTGACAATG-3'      |
| <i>GPR1</i>               | 165                      | 5'-TGTA AACGCTTTCCCTTCTCT-3'  | 5'-ATGTCAGCAACTTCACGCAGA-3'     |
| <i>ADIPOQ</i>             | 64                       | 5'-ACAGGTGCAGAAGGACCGAG-3'    | 5'-AAGACAGAGCCGCTTGCTTG-3'      |
| <i>ADIPOR1</i>            | 350                      | 5'-GAATACACACCGAGACGGGC-3'    | 5'-GCCCAAGACGCAGACAATGG-3'      |
| <i>ADIPOR2</i>            | 345                      | 5'-GAGACTGGCAACATCTGGAC-3'    | 5'-TGCGATGCCCAGGACACAAA-3'      |
| <i>NAMPT</i>              | 84                       | 5'-CCGATCCAAACAAACGGTCAAAG-3' | 5'-TGCCTTCTTCAAGTGTCACATAATC-3' |
| <i>P450<br/>aromatase</i> | 144                      | 5'-TGCTCCTGATACTCTGTCCG-3'    | 5'-TTGAGGTTTGGCATGTCATC-3'      |
| <i>StAR</i>               | 102                      | 5'-AAGTGATGGCCCTTATCTCGG-3'   | 5'-TGGCTGCTACAAACACTGCTG-3'     |
